# Supplementary material for: Serpina1e mediates the exercise-induced enhancement of hippocampal memory
Source: Research Square preprint supplement (doi:10.21203/rs.3.rs-4971959/v1), 2024-09-27
Supplement: Supplementary file 2 [file 6568b483630fdec8fae02d09.xlsx]

## Sheet: Plasma_merged_protein_lo_ttest_
	Raw																				Imputed																									average(log2intensityBiotinEX)-average(log2intensityBiotin)
	Biotin								Biotin_Ex								PBS				Biotin								Biotin_Ex								PBS									log2 fold change
Gene names (primary )	Intensity Biotin_1_118_Naq448_J100_2106	Intensity Biotin_172_Naq448_J100_2201	Intensity Biotin_2_125_Naq448_J100_2106	Intensity Biotin_245_Naq448_J100_2201	Intensity Biotin_254_Naq448_J100_2201	Intensity Biotin_3_273_Naq448_J100_2106	Intensity Biotin_309_Naq448_J100_2201	Intensity Biotin_4_584_Naq448_J100_2106	Intensity Biotin_EX_1_122_Naq448_J100_2106	Intensity Biotin_EX_2_124_Naq448_J100_2106	Intensity Biotin_EX_276_Naq448_J100_2201	Intensity Biotin_EX_280_Naq448_J100_2201	Intensity Biotin_EX_281_Naq448_J100_2201	Intensity Biotin_EX_3_320_Naq448_J100_2106	Intensity Biotin_EX_327_Naq448_J100_2201	Intensity Biotin_EX_4_338_Naq448_J100_2106	Intensity PBS_1_114_Naq448_J100_2106	Intensity PBS_170_Naq448_J100_2201	Intensity PBS_171_Naq448_J100_2201	Intensity PBS_2_510_Naq448_J100_2106	Intensity Biotin_1_118_Naq448_J100_2107	Intensity Biotin_172_Naq448_J100_2202	Intensity Biotin_2_125_Naq448_J100_2107	Intensity Biotin_245_Naq448_J100_2202	Intensity Biotin_254_Naq448_J100_2202	Intensity Biotin_3_273_Naq448_J100_2107	Intensity Biotin_309_Naq448_J100_2202	Intensity Biotin_4_584_Naq448_J100_2107	Intensity Biotin_EX_1_122_Naq448_J100_2107	Intensity Biotin_EX_2_124_Naq448_J100_2107	Intensity Biotin_EX_276_Naq448_J100_2202	Intensity Biotin_EX_280_Naq448_J100_2202	Intensity Biotin_EX_281_Naq448_J100_2202	Intensity Biotin_EX_3_320_Naq448_J100_2107	Intensity Biotin_EX_327_Naq448_J100_2202	Intensity Biotin_EX_4_338_Naq448_J100_2107	Intensity PBS_1_114_Naq448_J100_2107	Intensity PBS_170_Naq448_J100_2202	Intensity PBS_171_Naq448_J100_2202	Intensity PBS_2_510_Naq448_J100_2107	Student's T-test Significant Biotin_Biotin_Ex	Student's T-test significant	PepCount	Student's T-test p-value Biotin_Biotin_Ex	Student's T-test q-value Biotin_Biotin_Ex	Student's T-test Difference Biotin_Biotin_Ex	Student's T-test Test statistic Biotin_Biotin_Ex	Protein	Entry name
Ighg1	23.7767																																										2					A0A075B5P4	A0A075B5P4_MOUSE
Ighv8-8	24.7021			23.7011	26.4626		22.9454			24.6786	22.1744		25.1128								24.7021	21.641	22.3323	23.7011	26.4626	23.5114	22.9454	22.4577	22.924	24.6786	22.1744	22.4817	25.1128	23.3645	23.394	21.6318	20.774	20.3847	20.192	22.307			2	0.722711	0.540526	0.248963	0.362063	A0A0A6YXQ0	A0A0A6YXQ0_MOUSE
Serpina3k	30.6167	31.4355	31.3011	30.9414	31.3703	31.5423	31.8582	31.7	33.5123	33.4888	33.4435	33.461	33.5657	33.3968	33.4522	33.7692	21.2421	27.6215	27.6665	25.5881	30.6167	31.4355	31.3011	30.9414	31.3703	31.5423	31.8582	31.7	33.5123	33.4888	33.4435	33.461	33.5657	33.3968	33.4522	33.7692	21.2421	27.6215	27.6665	25.5881	+	Biotin_Biotin_Ex	18	7.04784e-10	0	-2.1655	-14.6349	A0A0R4J0I1	A0A0R4J0I1_MOUSE
Itih4	22.6941	21.8228		24.5983			21.4588		25.2622	24.3175	24.8163			24.2638		23.4283					22.6941	21.8228	21.4613	24.5983	22.9767	23.3186	21.4588	23.0809	25.2622	24.3175	24.8163	23.1053	22.7349	24.2638	23.313	23.4283	20.8249	20.833	20.5974	22.3394	+	Biotin_Biotin_Ex	4	0.0258242	0.00938462	-1.22872	-2.49278	A6X935	ITIH4_MOUSE
C7	25.6442	24.3417	25.6165	24.303	25.9891	25.6399	24.9016	25.297	25.8048	26.3767		26.1553		25.0253	26.2147	26.7727					25.6442	24.3417	25.6165	24.303	25.9891	25.6399	24.9016	25.297	25.8048	26.3767	21.925	26.1553	23.4996	25.0253	26.2147	26.7727	21.0715	20.5416	20.7461	23.1157			3	0.993659	0.988051	-0.00514388	-0.00809104	D3YXF5	D3YXF5_MOUSE
Fga	27.9858	26.9107	27.8675	28.5999	26.7393	28.3031	27.147	27.5092	30.473	30.2922	30.1345	28.7427	29.4407	30.4406	29.9764	29.0348	26.0554	24.8504	24.1811	23.7801	27.9858	26.9107	27.8675	28.5999	26.7393	28.3031	27.147	27.5092	30.473	30.2922	30.1345	28.7427	29.4407	30.4406	29.9764	29.0348	26.0554	24.8504	24.1811	23.7801	+	Biotin_Biotin_Ex	53	1.27765e-05	0	-2.18403	-6.55634	E9PV24	FIBA_MOUSE
Apob	22.9663	25.0564	22.6613	22.6048	24.7998		23.5376		24.5964	24.5062	24.6296	25.9971	25.5042	24.4593	24.848	27.275		22.1725	22.5959		22.9663	25.0564	22.6613	22.6048	24.7998	21.4721	23.5376	22.9923	24.5964	24.5062	24.6296	25.9971	25.5042	24.4593	24.848	27.275	21.0301	22.1725	22.5959	22.5919	+	Biotin_Biotin_Ex	2	0.00289454	0.000782609	-1.96565	-3.60069	E9Q414	APOB_MOUSE
C6	26.0438	26.3757	25.6924	24.1752	26.1277	26.4294	24.9642	25.9514	26.8794	28.2546	27.1165	27.6803	26.8526	28.1205	28.8121	28.1104					26.0438	26.3757	25.6924	24.1752	26.1277	26.4294	24.9642	25.9514	26.8794	28.2546	27.1165	27.6803	26.8526	28.1205	28.8121	28.1104	21.209	21.6947	20.5591	22.2985	+	Biotin_Biotin_Ex	12	9.87755e-05	0	-2.00831	-5.37023	E9Q6D8	E9Q6D8_MOUSE
Cfhr4	22.5694	21.8529							22.6888	23.3515				23.0424		23.2829					22.5694	21.8529	21.8523	22.1708	21.8026	21.9262	20.6645	22.8696	22.6888	23.3515	20.6206	22.908	22.2859	23.0424	22.4552	23.2829	20.9099	20.513	20.274	22.324			3	0.132702	0.0614839	-0.615884	-1.59648	E9Q8B5	E9Q8B5_MOUSE
Kng1	27.1551		27.8753	28.0032	27.7388	27.9027	27.355	26.9615	29.6321	29.0964	29.3029	28.8695		29.0679	29.0275	28.8221	23.4008	22.9714	23.4008	23.0108	27.1551	21.6376	27.8753	28.0032	27.7388	27.9027	27.355	26.9615	29.6321	29.0964	29.3029	28.8695	22.7995	29.0679	29.0275	28.8221	23.4008	22.9714	23.4008	23.0108			6	0.192818	0.0960625	-1.49859	-1.36817	O08677	KNG1_MOUSE
Afm	22.4091	24.2123	22.9699	23.1924		24.5799	22.9506			25.4836	25.4281	24.4142	25.4232	25.5158		25.7599					22.4091	24.2123	22.9699	23.1924	21.4274	24.5799	22.9506	23.65	22.1462	25.4836	25.4281	24.4142	25.4232	25.5158	22.3516	25.7599	20.6382	19.675	20.3908	22.5193	+	Biotin_Biotin_Ex	4	0.0452617	0.0192857	-1.39138	-2.19809	O89020	AFAM_MOUSE
C3	26.1043	26.5748	25.5282	26.9951	26.6851	26.0954	26.0424	26.2649	27.6069	27.227	28.4157	28.2662	27.8192	27.4444	27.8655	27.8479		22.4173	22.5443		26.1043	26.5748	25.5282	26.9951	26.6851	26.0954	26.0424	26.2649	27.6069	27.227	28.4157	28.2662	27.8192	27.4444	27.8655	27.8479	21.8507	22.4173	22.5443	22.3265	+	Biotin_Biotin_Ex	30	4.87836e-06	0	-1.5253	-7.1574	P01027	CO3_MOUSE
C4b	26.733	27.9586	26.6942	26.4704	27.2428	27.2206	26.7205	27.8135	28.6147	27.8287	26.8631	28.9033	27.369	28.089	27.7068	28.5151					26.733	27.9586	26.6942	26.4704	27.2428	27.2206	26.7205	27.8135	28.6147	27.8287	26.8631	28.9033	27.369	28.089	27.7068	28.5151	21.4035	20.3777	20.912	22.6009	+	Biotin_Biotin_Ex	11	0.0132538	0.00481633	-0.879506	-2.8343	P01029	CO4B_MOUSE
Jchain	21.246		24.3124													25.2314																											3					P01592	IGJ_MOUSE
0	24.2631			24.7328		27.7849										26.6778																											5					P01804	HVM35_MOUSE
0	23.5713		23.3273	21.9208	26.4851		21.6231				24.8609	22.8278	26.9522			25.6788					23.5713	22.0399	23.3273	21.9208	26.4851	22.0787	21.6231	23.0096	22.3133	22.6067	24.8609	22.8278	26.9522	21.2307	22.9126	25.6788	20.1879	19.5407	21.3576	22.2706			2	0.464159	0.278054	-0.665898	-0.752597	P01820	HVM44_MOUSE
Igkc	24.2691		22.4459	21.8374							23.0306		25.3095	22.6256		25.1647					24.2691	21.4729	22.4459	21.8374	22.0194	22.5377	21.8486	22.2782	22.0707	20.9255	23.0306	23.1175	25.3095	22.6256	22.9765	25.1647	21.4241	21.2088	20.0752	22.1057			3	0.197658	0.0976	-0.813928	-1.3525	P01837	IGKC_MOUSE
Ighg1	25.5047																																										3					P01868	IGHG1_MOUSE
Ighm	28.3043	27.6762	28.4572	28.1657	27.4212	26.7735	24.8775	27.8292	25.737	24.7618	27.5021	26.5594	29.0381	26.3768		30.2795					28.3043	27.6762	28.4572	28.1657	27.4212	26.7735	24.8775	27.8292	25.737	24.7618	27.5021	26.5594	29.0381	26.3768	22.881	30.2795	20.9872	20.2896	20.4718	23.0186			7	0.403441	0.231611	0.796122	0.861569	P01872	IGHM_MOUSE
B2m						27.1439						24.9748																															4					P01887	B2MG_MOUSE
Cfb	25.0091	25.3644	24.9775	25.5316	26.0993	25.8278	26.0017	25.0711	27.063	26.4045	27.1542	27.7166	27.8665	26.5966	28.0635	26.5814			21.8357		25.0091	25.3644	24.9775	25.5316	26.0993	25.8278	26.0017	25.0711	27.063	26.4045	27.1542	27.7166	27.8665	26.5966	28.0635	26.5814	20.4871	19.6785	21.8357	22.5603	+	Biotin_Biotin_Ex	6	2.61965e-05	0	-1.69546	-6.12691	P04186	CFAB_MOUSE
C9	27.9753	26.2339	27.4917	27.8813	27.6694	27.1137	27.4866	27.046	29.7617	30.2551	29.2077	30.0466	29.6822	29.3819	28.0583	30.1571		22.3215	23.1903		27.9753	26.2339	27.4917	27.8813	27.6694	27.1137	27.4866	27.046	29.7617	30.2551	29.2077	30.0466	29.6822	29.3819	28.0583	30.1571	20.7566	22.3215	23.1903	22.1052	+	Biotin_Biotin_Ex	11	7.48185e-06	0	-2.2066	-6.88666	P06683	CO9_MOUSE
C5	25.3587	26.26	25.1148	25.5607	24.8956	25.2459	25.7061	25.6033	27.2197	26.7515	27.5352	28.5433	28.2445	26.6843	28.0609	27.0281					25.3587	26.26	25.1148	25.5607	24.8956	25.2459	25.7061	25.6033	27.2197	26.7515	27.5352	28.5433	28.2445	26.6843	28.0609	27.0281	20.9281	20.8719	19.2296	22.0825	+	Biotin_Biotin_Ex	16	5.90531e-06	0	-2.0403	-7.03569	P06684	CO5_MOUSE
Cfh	24.4039	23.9992	24.4835	24.5534	24.2857	24.2799	24.0952	24.2447	26.2516	26.0581	25.6317	25.6982	25.8614	25.8883	25.2967	25.9485					24.4039	23.9992	24.4835	24.5534	24.2857	24.2799	24.0952	24.2447	26.2516	26.0581	25.6317	25.6982	25.8614	25.8883	25.2967	25.9485	21.2579	20.2522	20.5794	22.2164	+	Biotin_Biotin_Ex	23	5.04286e-09	0	-1.53614	-12.5893	P06909	CFAH_MOUSE
Ttr			23.1566	24.3251					25.179	24.3321	25.7552			23.7948		23.2724					21.8572	20.8648	23.1566	24.3251	21.7245	22.5026	21.1107	20.8159	25.179	24.3321	25.7552	23.2369	23.1665	23.7948	24.1208	23.2724	21.2866	20.3833	20.2081	22.37	+	Biotin_Biotin_Ex	5	0.00213939	0.000355556	-2.06254	-3.7533	P07309	TTHY_MOUSE
Alb	30.4566	30.5908	30.6876	30.4572	30.5089	30.6959	30.7923	30.439	32.2237	32.2323	32.6326	32.5084	32.9849	32.5186	32.9919	32.62	25.4151	26.3781	26.2714	25.6881	30.4566	30.5908	30.6876	30.4572	30.5089	30.6959	30.7923	30.439	32.2237	32.2323	32.6326	32.5084	32.9849	32.5186	32.9919	32.62	25.4151	26.3781	26.2714	25.6881	+	Biotin_Biotin_Ex	66	5.43997e-11	0	-2.0105	-17.737	P07724	ALBU_MOUSE
Serpina1a	24.116	23.6443	24.4664	24.2266	23.9263	25.4665	23.9819	24.5361	25.9737	26.5629	26.6771	26.8063	26.7158	26.9576	26.8249	26.7642					24.116	23.6443	24.4664	24.2266	23.9263	25.4665	23.9819	24.5361	25.9737	26.5629	26.6771	26.8063	26.7158	26.9576	26.8249	26.7642	22.0701	19.0186	20.8548	22.4014	+	Biotin_Biotin_Ex	15	4.5062e-08	0	-2.3648	-10.6022	P07758	A1AT1_MOUSE
Serpina3k	26.3889	27.0404	25.8674	27.1792	26.7775	25.6858	27.7481	27.5023	27.858	28.5468	29.4319	30.0094	29.3671	28.89	29.7404	29.0144			23.0783		26.3889	27.0404	25.8674	27.1792	26.7775	25.6858	27.7481	27.5023	27.858	28.5468	29.4319	30.0094	29.3671	28.89	29.7404	29.0144	21.2997	20.0974	23.0783	22.4216	+	Biotin_Biotin_Ex	13	1.37041e-05	0	-2.33352	-6.51374	P07759	SPA3K_MOUSE
Apoa2	23.8172	23.3256	23.9		22.8947	24.4319	23.0161	23.8779	24.7565	25.2827	24.6136	24.6236	23.8766	24.7474		25.3459					23.8172	23.3256	23.9	21.5953	22.8947	24.4319	23.0161	23.8779	24.7565	25.2827	24.6136	24.6236	23.8766	24.7474	24.383	25.3459	20.5978	21.8831	20.5746	23.0077	+	Biotin_Biotin_Ex	3	0.0018406	0.00027907	-1.34634	-3.82946	P09813	APOA2_MOUSE
Lcat	25.6606	23.9738	25.7508	24.4402	26.0235	26.0902		25.4485	26.7287	26.751	23.3742	26.5694		25.9472		27.0334					25.6606	23.9738	25.7508	24.4402	26.0235	26.0902	21.144	25.4485	26.7287	26.751	23.3742	26.5694	22.3412	25.9472	25.0805	27.0334	21.8701	19.5034	20.9946	22.5936			2	0.451288	0.269973	-0.661768	-0.774902	P16301	LCAT_MOUSE
F2	24.656	25.1344	24.8154	23.3112	24.241	24.9978	24.5262	24.9736	26.3411	26.6618	25.4364	25.8575	25.5071	25.7125		26.3399					24.656	25.1344	24.8154	23.3112	24.241	24.9978	24.5262	24.9736	26.3411	26.6618	25.4364	25.8575	25.5071	25.7125	22.9484	26.3399	20.7273	20.1959	20.616	22.2073	+	Biotin_Biotin_Ex	12	0.0434768	0.0184	-1.01864	-2.21954	P19221	THRB_MOUSE
Plg	27.2604	26.6402	26.6353	27.0402	26.739	27.1411	26.6018	26.5075	29.1978	29.3081	28.6274	28.7089	28.6716	28.7857	28.4288	29.17			22.0116		27.2604	26.6402	26.6353	27.0402	26.739	27.1411	26.6018	26.5075	29.1978	29.3081	28.6274	28.7089	28.6716	28.7857	28.4288	29.17	21.4818	19.9106	22.0116	22.0605	+	Biotin_Biotin_Ex	17	2.01275e-09	0	-2.04159	-13.5109	P20918	PLMN_MOUSE
Gc	24.9347	24.9509	25.0197	23.4257	25.3215	25.1146	24.6265	24.9608	26.4529	26.1829	26.0412	28.0111	26.2971	26.5794	26.3548	26.7123		23.2103	23.1486		24.9347	24.9509	25.0197	23.4257	25.3215	25.1146	24.6265	24.9608	26.4529	26.1829	26.0412	28.0111	26.2971	26.5794	26.3548	26.7123	21.0672	23.2103	23.1486	22.124	+	Biotin_Biotin_Ex	11	3.64528e-05	0	-1.78465	-5.93427	P21614	VTDB_MOUSE
Serpina1b	23.0061	24.4294	23.0364	23.7617	23.9681	23.8415	24.7923	24.1129	24.712	25.3323	26.3862	27.7079	26.9928	26.3315	26.8632	26.2043					23.0061	24.4294	23.0364	23.7617	23.9681	23.8415	24.7923	24.1129	24.712	25.3323	26.3862	27.7079	26.9928	26.3315	26.8632	26.2043	21.0894	20.2975	21.6724	22.3032	+	Biotin_Biotin_Ex	7	2.62149e-05	0	-2.44772	-6.1265	P22599	A1AT2_MOUSE
Ces1c	24.465	24.4054	24.9329	24.6492	24.6562	25.1874	24.3315	24.7963	27.0802	26.8426	26.5861	26.7687	27.003	26.9444	26.6327	26.5148					24.465	24.4054	24.9329	24.6492	24.6562	25.1874	24.3315	24.7963	27.0802	26.8426	26.5861	26.7687	27.003	26.9444	26.6327	26.5148	20.4513	20.1593	20.4925	21.9393	+	Biotin_Biotin_Ex	6	1.02296e-10	0	-2.11856	-16.9214	P23953	EST1C_MOUSE
Klkb1	22.3214	22.0641	22.7646	21.6729	21.6643	21.9392	21.5744	22.3167	24.3757	24.404	24.0508	22.7929	22.9864	24.5188	22.9861	24.024					22.3214	22.0641	22.7646	21.6729	21.6643	21.9392	21.5744	22.3167	24.3757	24.404	24.0508	22.7929	22.9864	24.5188	22.9861	24.024	21.2173	19.7338	21.3992	22.9995	+	Biotin_Biotin_Ex	16	4.03007e-05	0	-1.72764	-5.87635	P26262	KLKB1_MOUSE
Mug1	26.6651	27.4125	27.0428	26.278	25.9906	26.3912	27.1801	26.7014	28.8616	28.9784	29.2267	29.1311	29.1983	29.322	29.4925	28.9746		23.7086	22.0568		26.6651	27.4125	27.0428	26.278	25.9906	26.3912	27.1801	26.7014	28.8616	28.9784	29.2267	29.1311	29.1983	29.322	29.4925	28.9746	20.6082	23.7086	22.0568	22.4684	+	Biotin_Biotin_Ex	58	2.89509e-09	0	-2.44044	-13.1394	P28665	MUG1_MOUSE
Ahsg	24.5316	23.2661	24.2719	23.8745	23.4524	23.9635	23.2512	23.1706	26.1218	26.4243	25.2705	24.9674	25.7042	26.2269	25.0094	26.128					24.5316	23.2661	24.2719	23.8745	23.4524	23.9635	23.2512	23.1706	26.1218	26.4243	25.2705	24.9674	25.7042	26.2269	25.0094	26.128	21.0226	19.1351	21.492	22.4093	+	Biotin_Biotin_Ex	3	3.69875e-06	0	-2.00885	-7.33598	P29699	FETUA_MOUSE
Serpinc1	27.1542	27.5416	27.1613	27.4515	27.4499	27.6179	27.3143	27.3052	28.7971	29.1796	29.2916	29.3766	29.5767	29.0185	29.4613	28.9605					27.1542	27.5416	27.1613	27.4515	27.4499	27.6179	27.3143	27.3052	28.7971	29.1796	29.2916	29.3766	29.5767	29.0185	29.4613	28.9605	21.4366	21.1018	19.7373	21.8492	+	Biotin_Biotin_Ex	12	1.60942e-10	0	-1.83325	-16.3573	P32261	ANT3_MOUSE
Mbl1	24.846	24.0037	24.386	25.3927	25.6527	24.5903	24.9071	24.9532	27.0628	26.7583	27.0339	26.0138	26.6026	26.4608	27.0938	26.28					24.846	24.0037	24.386	25.3927	25.6527	24.5903	24.9071	24.9532	27.0628	26.7583	27.0339	26.0138	26.6026	26.4608	27.0938	26.28	20.7429	20.506	20.4609	23.0434	+	Biotin_Biotin_Ex	5	1.84072e-06	0	-1.82179	-7.79846	P39039	MBL1_MOUSE
Lifr	27.612	27.8563	27.7052	27.3673	27.5942	27.2677	26.7644	27.4981	29.5299	29.6781	29.679	29.8491	29.5219	29.7376	29.5698	30.2283		22.9781			27.612	27.8563	27.7052	27.3673	27.5942	27.2677	26.7644	27.4981	29.5299	29.6781	29.679	29.8491	29.5219	29.7376	29.5698	30.2283	20.969	22.9781	19.8985	21.5168	+	Biotin_Biotin_Ex	5	2.76525e-10	0	-2.26606	-15.706	P42703	LIFR_MOUSE
Pon1	22.3092										22.768			23.2137		24.5057																											2					P52430	PON1_MOUSE
Sparcl1	25.6517	23.8072	25.8328			25.9116		25.5096	25.8975	25.6639				25.2011		27.3049					25.6517	23.8072	25.8328	20.7225	22.9546	25.9116	21.6298	25.5096	25.8975	25.6639	21.1091	22.7421	23.2365	25.2011	23.447	27.3049	20.8005	20.4336	20.088	21.7326			2	0.756245	0.581195	-0.322796	-0.316564	P70663	SPRL1_MOUSE
Serping1	26.4991	27.946	27.5267	26.9564	27.4319	27.802	26.6702	26.6836	28.9277	28.5999	27.0822	28.2389	26.7373	28.0137	27.1387	29.0576					26.4991	27.946	27.5267	26.9564	27.4319	27.802	26.6702	26.6836	28.9277	28.5999	27.0822	28.2389	26.7373	28.0137	27.1387	29.0576	21.1383	20.3191	20.9512	22.8223	+	Biotin_Biotin_Ex	10	0.0532716	0.0224561	-0.784988	-2.11066	P97290	IC1_MOUSE
Masp1	22.5803									23.4588				23.1136																													3					P98064	MASP1_MOUSE
Apoa1	30.607	30.047	30.8569	28.9466	30.1819	30.0231	29.9123	30.7012	31.594	32.2537	31.9656	31.7849	32.4451	31.3201	31.8346	32.8695	22.9207	26.6489	26.0677	24.4819	30.607	30.047	30.8569	28.9466	30.1819	30.0231	29.9123	30.7012	31.594	32.2537	31.9656	31.7849	32.4451	31.3201	31.8346	32.8695	22.9207	26.6489	26.0677	24.4819	+	Biotin_Biotin_Ex	15	1.00969e-05	0	-1.84892	-6.70051	Q00623	APOA1_MOUSE
Serpina1c	23.1922	23.172			24.0269		23.8842		25.4698	26.1518	27.2423	26.4498	26.8471	26.8716	26.6795	26.5067					23.1922	23.172	22.164	21.7292	24.0269	22.3934	23.8842	22.415	25.4698	26.1518	27.2423	26.4498	26.8471	26.8716	26.6795	26.5067	21.5723	20.7675	20.956	21.9237	+	Biotin_Biotin_Ex	5	5.23237e-08	0	-3.65524	-10.4765	Q00896	A1AT3_MOUSE
Serpina1e	21.8396								25.0062	24.2114	25.2167		25.0081	25.2291	25.2075	25.2173					21.8396	21.4379	21.7111	20.5186	22.3636	22.7019	21.4368	22.0349	25.0062	24.2114	25.2167	23.815	25.0081	25.2291	25.2075	25.2173	21.9169	20.9771	20.4919	22.247	+	Biotin_Biotin_Ex	5	6.89588e-08	0	-3.10839	-10.2474	Q00898	A1AT5_MOUSE
Egfr	27.3559	27.1775	27.6986	26.7194	26.5773	26.9216	26.5484	27.9342	28.8867	29.3332	28.6393	28.5385	28.4407	28.7857	28.3548	29.2902		22.4676	22.3484		27.3559	27.1775	27.6986	26.7194	26.5773	26.9216	26.5484	27.9342	28.8867	29.3332	28.6393	28.5385	28.4407	28.7857	28.3548	29.2902	22.0738	22.4676	22.3484	22.5687	+	Biotin_Biotin_Ex	5	3.26859e-06	0	-1.66705	-7.41662	Q01279	EGFR_MOUSE
Apoh	24.3066	24.3446	24.1051	24.0454	24.6922	24.8193	24.0119		26.3671	26.511	26.1849	25.8574	24.7927	25.6222	25.0911	25.6136					24.3066	24.3446	24.1051	24.0454	24.6922	24.8193	24.0119	22.8378	26.3671	26.511	26.1849	25.8574	24.7927	25.6222	25.0911	25.6136	21.1419	20.0026	20.6451	22.5607	+	Biotin_Biotin_Ex	5	0.000105909	0	-1.60961	-5.33167	Q01339	APOH_MOUSE
Bche	22.4463		21.9217	22.4048		22.7404	22.5219		24.0953	24.0108	24.3454		23.5492	24.014		23.8163					22.4463	21.3666	21.9217	22.4048	21.5752	22.7404	22.5219	22.534	24.0953	24.0108	24.3454	22.6996	23.5492	24.014	23.2317	23.8163	21.5658	20.8004	20.4028	21.8505	+	Biotin_Biotin_Ex	2	3.97096e-05	0	-1.53142	-5.88486	Q03311	CHLE_MOUSE
Serpina3m									23.0032	22.3466	21.4209			22.6875							21.0019	22.1803	21.8932	22.1911	22.6076	21.86	21.4143	23.1221	23.0032	22.3466	21.4209	22.5713	21.7568	22.6875	23.6631	22.3391	21.3243	20.3297	20.743	22.0851			3	0.216492	0.107333	-0.439786	-1.29434	Q03734	SPA3M_MOUSE
Pc	24.2013					24.9831											25.5768			25.563	24.2013	21.138	22.2065	20.6249	21.3676	24.9831	21.6973	22.3535	23.5932	22.621	20.9227	22.8679	23.6161	23.8995	23.822	23.1968	25.5768	21.0166	19.9347	25.563			3	0.262985	0.135072	-0.745901	-1.16628	Q05920	PYC_MOUSE
Clu	22.3994	26.8581		23.1416			24.0137	25.1358	25.7937	25.8888	25.5467		24.5693	23.9098	24.6257	25.4306					22.3994	26.8581	21.9912	23.1416	22.6638	22.8431	24.0137	25.1358	25.7937	25.8888	25.5467	23.2437	24.5693	23.9098	24.6257	25.4306	21.4564	21.3836	20.6571	22.0951	+	Biotin_Biotin_Ex	4	0.0846284	0.0371333	-1.24518	-1.85597	Q06890	CLUS_MOUSE
F13b	24.3171		24.4716			25.6427		24.4825	25.973	26.2423	25.4849			26.2163	25.2162	26.3981					24.3171	22.2637	24.4716	21.2937	23.2545	25.6427	21.6973	24.4825	25.973	26.2423	25.4849	23.117	23.7051	26.2163	25.2162	26.3981	21.6102	20.0203	20.9071	21.7901	+	Biotin_Biotin_Ex	5	0.0186691	0.0072	-1.86621	-2.65978	Q07968	F13B_MOUSE
Orm1	23.5319		23.8586	24.5358		24.0273	24.2414	22.7268	25.3038	25.8347	24.6071			24.8325	25.3093	24.2803					23.5319	21.8205	23.8586	24.5358	21.5831	24.0273	24.2414	22.7268	25.3038	25.8347	24.6071	23.3487	22.0096	24.8325	25.3093	24.2803	20.6808	21.059	19.9293	22.3073	+	Biotin_Biotin_Ex	4	0.0717865	0.0312414	-1.15008	-1.94773	Q60590	A1AG1_MOUSE
Cfi	25.4958	24.2464	25.9183	25.0901	25.3495	25.6866	24.719	24.6235	26.9709	27.2509	26.5897	26.3086	26.7725	26.8914	26.5273	26.9556					25.4958	24.2464	25.9183	25.0901	25.3495	25.6866	24.719	24.6235	26.9709	27.2509	26.5897	26.3086	26.7725	26.8914	26.5273	26.9556	20.2775	19.9869	20.158	22.4911	+	Biotin_Biotin_Ex	9	4.83916e-06	0	-1.64222	-7.16256	Q61129	CFAI_MOUSE
Cp	24.4978	24.4818	24.0606	26.1666	26.4714	24.6193	24.2926	24.0227	26.1299	26.031	26.942	25.9758	25.9407	26.3309	26.4113	25.8954		21.4074	21.4589		24.4978	24.4818	24.0606	26.1666	26.4714	24.6193	24.2926	24.0227	26.1299	26.031	26.942	25.9758	25.9407	26.3309	26.4113	25.8954	20.8461	21.4074	21.4589	21.9303	+	Biotin_Biotin_Ex	19	0.0017164	0.000195122	-1.38052	-3.8649	Q61147	CERU_MOUSE
Serpinf2	26.9421	26.8806	26.5884	27.6082	27.5432	27.1948	26.9251	27.3768	29.4579	29.037	28.9313	29.3412	29.0345	29.535	29.3525	29.3075		23.1631	23.2288		26.9421	26.8806	26.5884	27.6082	27.5432	27.1948	26.9251	27.3768	29.4579	29.037	28.9313	29.3412	29.0345	29.535	29.3525	29.3075	21.0099	23.1631	23.2288	22.0811	+	Biotin_Biotin_Ex	15	1.00695e-09	0	-2.11722	-14.2439	Q61247	A2AP_MOUSE
Hp				25.9094																																							2					Q61646	HPT_MOUSE
Itih1	22.4531	27.0113	22.8645	26.3631	24.1468		26.7029	26.3774	24.6691	23.6472	28.2518	27.8477	28.4159	25.3618		25.782			22.3896		22.4531	27.0113	22.8645	26.3631	24.1468	23.7863	26.7029	26.3774	24.6691	23.6472	28.2518	27.8477	28.4159	25.3618	21.6875	25.782	20.9105	21.3541	22.3896	21.8333			2	0.497248	0.303413	-0.74469	-0.696944	Q61702	ITIH1_MOUSE
Itih2	22.9291	21.9325							23.2367	22.7937	23.9837			24.1128		23.6259					22.9291	21.9325	21.7324	20.9603	21.4881	23.1777	20.9302	23.8469	23.2367	22.7937	23.9837	23.1987	21.6229	24.1128	24.28	23.6259	21.065	20.1187	20.2186	21.6058	+	Biotin_Biotin_Ex	5	0.0243438	0.00909804	-1.23215	-2.52332	Q61703	ITIH2_MOUSE
Pzp	30.7246	30.6999	30.4955	31.1611	30.8339	30.1247	31.2724	30.8579	32.9318	32.6637	33.4316	33.3453	33.3417	33.0029	32.9422	32.7341	26.5123	26.9555	26.5123	26.7354	30.7246	30.6999	30.4955	31.1611	30.8339	30.1247	31.2724	30.8579	32.9318	32.6637	33.4316	33.3453	33.3417	33.0029	32.9422	32.7341	26.5123	26.9555	26.5123	26.7354	+	Biotin_Biotin_Ex	30	1.42906e-09	0	-2.27791	-13.8691	Q61838	PZP_MOUSE
Kng2									22.4097	22.5564	22.09			22.5991		22.3805					20.9209	22.6193	22.0091	21.9052	22.3264	23.1496	21.3078	22.3833	22.4097	22.5564	22.09	22.7198	21.11	22.5991	23.1908	22.3805	21.19	19.7035	20.4618	22.2943			2	0.372585	0.213014	-0.304336	-0.921127	Q6S9I0	Q6S9I0_MOUSE
Srl	21.7216																24.4696			23.7224	21.7216	21.4722	22.7961	22.6106	22.6285	23.052	21.5232	23.3753	22.6799	22.8287	23.0576	23.0389	22.6322	22.4165	23.2394	22.8353	24.4696	21.3008	19.8212	23.7224			4	0.128142	0.0597377	-0.443632	-1.61718	Q7TQ48	SRCA_MOUSE
F12		23.529									24.9094																																2					Q80YC5	FA12_MOUSE
C8b	23.1969	23.3033	23.3674	22.9339			23.3129		25.3479	25.8023	25.4272	24.9247	24.4411	25.6911	24.889	25.685					23.1969	23.3033	23.3674	22.9339	22.1622	23.0203	23.3129	21.8709	25.3479	25.8023	25.4272	24.9247	24.4411	25.6911	24.889	25.685	20.6454	19.5738	21.095	22.1384	+	Biotin_Biotin_Ex	9	3.17036e-07	0	-2.38006	-9.04972	Q8BH35	CO8B_MOUSE
C1sa	24.1452	27.344	26.6843	25.9779	27.201	28.1916	26.3552		26.2581	28.2526	26.6211	29.0953	28.172	25.0344	27.3993	26.6811	23.2348	22.6211	23.2348	23.4623	24.1452	27.344	26.6843	25.9779	27.201	28.1916	26.3552	23.2886	26.2581	28.2526	26.6211	29.0953	28.172	25.0344	27.3993	26.6811	23.2348	22.6211	23.2348	23.4623			2	0.184483	0.0910476	-1.04073	-1.39592	Q8CG14	CS1A_MOUSE
Fgb	27.558	26.1173	27.0768	27.0568	25.9975	27.3997	26.2309	27.6921	29.2242	29.2005	28.0655	27.8304	27.6838	28.61	28.2923	28.1347					27.558	26.1173	27.0768	27.0568	25.9975	27.3997	26.2309	27.6921	29.2242	29.2005	28.0655	27.8304	27.6838	28.61	28.2923	28.1347	20.2345	19.8917	19.9591	22.1495	+	Biotin_Biotin_Ex	19	0.000344274	0	-1.48906	-4.69524	Q8K0E8	FIBB_MOUSE
C8a	25.1526	23.7919	24.9072	24.9694	24.7513	24.4394	23.9015	24.4862	27.1567	27.0366	27.1227	26.6286	26.9206	26.9899	26.5893	26.6542					25.1526	23.7919	24.9072	24.9694	24.7513	24.4394	23.9015	24.4862	27.1567	27.0366	27.1227	26.6286	26.9206	26.9899	26.5893	26.6542	20.3307	21.0666	20.3017	22.4144	+	Biotin_Biotin_Ex	3	8.43473e-09	0	-2.33737	-12.097	Q8K182	CO8A_MOUSE
Serpina10	22.9562								24.3175	24.3478						23.8332																											3					Q8R121	ZPI_MOUSE
Fgg	27.9047	26.6829	28.0134	27.4474	26.7811	28.6353	26.8233	27.6735	29.2991	29.989	28.1956	28.3565	28.5309	29.6998	28.5624	28.5094	23.2526		23.2118	23.3546	27.9047	26.6829	28.0134	27.4474	26.7811	28.6353	26.8233	27.6735	29.2991	29.989	28.1956	28.3565	28.5309	29.6998	28.5624	28.5094	23.2526	20.309	23.2118	23.3546	+	Biotin_Biotin_Ex	23	0.00112414	0	-1.39766	-4.0805	Q8VCM7	FIBG_MOUSE
Serpina3n		23.027		24.5741	22.6282	22.199	23.233		23.1028	23.1618	24.8794	24.8154	24.8259	22.9225	24.1106	22.6575					21.3093	23.027	21.4862	24.5741	22.6282	22.199	23.233	21.9663	23.1028	23.1618	24.8794	24.8154	24.8259	22.9225	24.1106	22.6575	20.5718	20.6473	19.7392	22.8842	+	Biotin_Biotin_Ex	3	0.0258919	0.00928302	-1.25658	-2.49143	Q91WP6	SPA3N_MOUSE
Hpx	27.1911	27.1403	26.8194	27.3624	26.3761	26.5559	27.038	27.9679	28.8822	28.6282	28.9493	29.3749	28.5248	28.4466	28.5774	28.6167					27.1911	27.1403	26.8194	27.3624	26.3761	26.5559	27.038	27.9679	28.8822	28.6282	28.9493	29.3749	28.5248	28.4466	28.5774	28.6167	20.7685	20.0522	20.2246	22.164	+	Biotin_Biotin_Ex	15	9.8519e-07	0	-1.69364	-8.22849	Q91X72	HEMO_MOUSE
Lrg1	28.7933	24.3619	26.9278	22.6169		27.0355	24.0589	26.2196	29.4416	29.2461	25.6641		25.4348	28.1309	25.92	28.2406					28.7933	24.3619	26.9278	22.6169	22.3467	27.0355	24.0589	26.2196	29.4416	29.2461	25.6641	22.3045	25.4348	28.1309	25.92	28.2406	20.5918	21.1629	20.2135	23.0774			2	0.223636	0.109059	-1.50276	-1.27334	Q91XL1	Q91XL1_MOUSE
Tf	27.9125	27.9658	27.9759	27.7295	27.7014	27.0782	27.7802	27.7103	29.8493	29.8155	30.2636	30.0628	30.2184	30.0863	29.7708	30.2017	22.9927	23.2593	22.941	23.8937	27.9125	27.9658	27.9759	27.7295	27.7014	27.0782	27.7802	27.7103	29.8493	29.8155	30.2636	30.0628	30.2184	30.0863	29.7708	30.2017	22.9927	23.2593	22.941	23.8937	+	Biotin_Biotin_Ex	68	2.64783e-11	0	-2.30186	-18.711	Q921I1	TRFE_MOUSE
Proz	22.8018		22.7863						25.7193	25.6377				24.393		24.6088					22.8018	20.6369	22.7863	21.9484	22.5821	22.4968	21.5791	22.7799	25.7193	25.6377	23.0727	24.4163	23.301	24.393	23.7866	24.6088	20.7669	21.4365	20.6949	21.8429	+	Biotin_Biotin_Ex	5	0.000223133	0	-2.16552	-4.92617	Q9CQW3	PROZ_MOUSE
Cpn2	25.9123	26.4134	26.8376	26.1871	25.7609	26.6948	24.7935		27.8615	27.5439	27.9051	26.6883	27.3739	28.0824	27.769	27.7656					25.9123	26.4134	26.8376	26.1871	25.7609	26.6948	24.7935	21.7381	27.8615	27.5439	27.9051	26.6883	27.3739	28.0824	27.769	27.7656	20.6627	20.7491	20.3353	22.719	+	Biotin_Biotin_Ex	2	0.00413433	0.00144681	-2.0815	-3.42126	Q9DBB9	CPN2_MOUSE
Ica										22.9712	23.6194																																3					Q9DBD0	ICA_MOUSE
Hrg	25.2894	23.3033	24.4256	23.6855		24.4555	23.1551		26.5301	26.8189	25.8152	24.7763	25.5954	26.7509	25.6116	26.4742					25.2894	23.3033	24.4256	23.6855	22.255	24.4555	23.1551	22.6791	26.5301	26.8189	25.8152	24.7763	25.5954	26.7509	25.6116	26.4742	20.9592	19.9002	20.4042	22.5629	+	Biotin_Biotin_Ex	7	8.50754e-05	0	-2.39052	-5.45317	Q9ESB3	HRG_MOUSE
Fetub	24.0647		23.4945	23.3185					24.579	24.4531	24.6807	24.3438		24.5262		25.1041					24.0647	21.3002	23.4945	23.3185	21.699	22.7489	20.5391	22.9861	24.579	24.4531	24.6807	24.3438	22.9376	24.5262	22.7404	25.1041	20.4335	20.1867	20.2101	22.1271	+	Biotin_Biotin_Ex	2	0.00713773	0.00216667	-1.65172	-3.14674	Q9QXC1	FETUB_MOUSE
Igkv5-39	22.8991		23.0345																																								1					A0A075B5M7	A0A075B5M7_MOUSE
Ighm	21.9178		22.944																																								1					A0A075B5P6	A0A075B5P6_MOUSE
Ighv8-12	26.5006																																										1					A0A075B5X8	A0A075B5X8_MOUSE
Mgam										23.0897																																	1					A0A0J9YVJ0	A0A0J9YVJ0_MOUSE
Serpina1c	25.1461	24.4373		24.9727	26.4313		25.6502	25.8406	27.3756	27.1457	27.3899	27.5543	27.3233	27.8187	27.5157	27.8889					25.1461	24.4373	21.8273	24.9727	26.4313	21.8395	25.6502	25.8406	27.3756	27.1457	27.3899	27.5543	27.3233	27.8187	27.5157	27.8889	20.8684	19.5755	20.4341	23.1705	+	Biotin_Biotin_Ex	1	0.000314467	0	-2.98337	-4.74318	A0A0R4J0X5	A0A0R4J0X5_MOUSE
Trdn																																											1					E9Q9K5	TRDN_MOUSE
Albfm1														22.201																													1					F8VQ07	F8VQ07_MOUSE
Ighv6-5	24.7679		23.4422			23.7156								22.9219		24.539																											1					J3QK03	J3QK03_MOUSE
Mstn						23.4593																																					1					O08689	GDF8_MOUSE
Man2b1														23.0938																													1					O09159	MA2B1_MOUSE
Pde8a				22.0602							24.0521	23.071																															1					O88502	PDE8A_MOUSE
F5																22.9592																											1					O88783	FA5_MOUSE
F10														22.6905																													1					O88947	FA10_MOUSE
0						23.4119																																					1					P01635	KV5A3_MOUSE
0											25.4141					25.2191																											1					P01821	HVM45_MOUSE
0	22.7831																																										1					P01864	GCAB_MOUSE
0												28.7081				24.4489																											1					P03977	KV3A4_MOUSE
Apoa4	22.5364	25.486			22.9993		25.9352		23.5767		25.627		24.5026		23.9199	26.7907					22.5364	25.486	21.953	20.6959	22.9993	21.9831	25.9352	22.9112	23.5767	22.3696	25.627	24.1052	24.5026	22.1487	23.9199	26.7907	21.4545	19.6109	19.7116	22.9302			1	0.22307	0.110209	-1.06755	-1.27498	P06728	APOA4_MOUSE
Ckm																	25.4561																										1					P07310	KCRM_MOUSE
Hsp90b1									22.6674	22.7085				22.4066																													1					P08113	ENPL_MOUSE
C4bpa	22.9121									24.6582				23.0218																													1					P08607	C4BPA_MOUSE
Lpl										22.5238						22.8927																											1					P11152	LIPL_MOUSE
Fn1	24.5959		24.3686	23.7071		24.27		24.6619	26.0884	26.4554	24.7706			25.9073		26.1183					24.5959	21.4765	24.3686	23.7071	22.1715	24.27	20.8616	24.6619	26.0884	26.4554	24.7706	23.2176	23.2031	25.9073	22.2902	26.1183	21.7971	20.0093	20.055	23.427	+	Biotin_Biotin_Ex	1	0.0800751	0.0349153	-1.49222	-1.88697	P11276	FINC_MOUSE
L1cam	21.7559		22.0293							22.587																																	1					P11627	L1CAM_MOUSE
Agt		24.4007									24.4506			23.329																													1					P11859	ANGT_MOUSE
F9										22.9053																																	1					P16294	FA9_MOUSE
Ctsa										23.9507				24.5382																													1					P16675	PPGB_MOUSE
Ighv3-6	22.543																																										1					P18531	HVM60_MOUSE
Vtn									23.8038	23.7073				23.7224																													1					P29788	VTNC_MOUSE
Saa4	23.2621								25.3347	24.8979	24.1727			23.6545		24.2623					23.2621	22.7724	21.4473	21.247	22.3879	23.1577	21.5118	22.5251	25.3347	24.8979	24.1727	23.002	23.5014	23.6545	22.989	24.2623	21.2469	19.5547	19.9006	22.5473	+	Biotin_Biotin_Ex	1	0.00107133	0	-1.68788	-4.10514	P31532	SAA4_MOUSE
Apoc1										22.1518																																	1					P34928	APOC1_MOUSE
Mbl2				22.4812						23.9483	24.9252	25.6564	24.1814	24.8353	23.5597	24.3912					22.1875	21.4211	21.9949	22.4812	23.4356	22.4757	21.2623	23.1177	21.8037	23.9483	24.9252	25.6564	24.1814	24.8353	23.5597	24.3912	21.0977	19.2878	21.2152	21.6103	+	Biotin_Biotin_Ex	1	0.00182912	0.000285714	-1.86563	-3.83263	P41317	MBL2_MOUSE
Igfbp2										22.9417				23.0797		24.6564																											1					P47877	IBP2_MOUSE
Serpind1														23.1435																													1					P49182	HEP2_MOUSE
Serpinf1				21.194																																							1					P97298	PEDF_MOUSE
Rbp4																																											1					Q00724	RET4_MOUSE
Nucb1	22.9814		22.6902																																								1					Q02819	NUCB1_MOUSE
Crisp1										22.5146																																	1					Q03401	CRIS1_MOUSE
Serpina6											25.5245	24.2963		25.5554																													1					Q06770	CBG_MOUSE
Igfn1																																											1					Q3KNY0	IGFN1_MOUSE
Serpina3g																																											1					Q5I2A0	SPA3G_MOUSE
Itih3		21.6704		24.278			22.094			24.6031	24.0702																																1					Q61704	ITIH3_MOUSE
Azgp1											23.3343																																1					Q64726	ZA2G_MOUSE
Ceacam14											24.7977																																1					Q78Y72	Q78Y72_MOUSE
Efcab3														21.9276																													1					Q80X60	EFCB3_MOUSE
Tmtc3																																											1					Q8BRH0	TMTC3_MOUSE
Masp2		23.2478							24.3394	25.2064	24.0386	24.6794		25.2091		24.8739					20.4628	23.2478	21.8288	21.2151	23.4872	23.1118	22.2078	22.2621	24.3394	25.2064	24.0386	24.6794	22.2604	25.2091	23.0531	24.8739	20.2306	21.0604	20.8456	22.5057	+	Biotin_Biotin_Ex	1	0.00212332	0.000363636	-1.97961	-3.75711	Q91WP0	MASP2_MOUSE
Pcyox1										21.1717	21.2583			21.1037																													1					Q9CQF9	PCYOX_MOUSE
Gpc1	23.1461		23.716	22.3641	23.066			23.2408	24.3886	23.6522	22.5743		23.4655	23.5427		24.5715					23.1461	21.0203	23.716	22.3641	23.066	22.445	21.0132	23.2408	24.3886	23.6522	22.5743	22.3721	23.4655	23.5427	23.4166	24.5715	21.076	21.1248	20.2539	22.768	+	Biotin_Biotin_Ex	1	0.0434685	0.0187407	-0.996494	-2.21964	Q9QZF2	GPC1_MOUSE
Nbn	29.0841	29.6777	28.9944	25.5452		29.4826	29.4733	29.9746	31.5232	27.7724	27.7177	31.2063	31.1802	27.2079	27.5415	31.2524					29.0841	29.6777	28.9944	25.5452	22.4073	29.4826	29.4733	29.9746	31.5232	27.7724	27.7177	31.2063	31.1802	27.2079	27.5415	31.2524	21.236	20.925	20.2111	22.0823			1	0.275238	0.141143	-1.34527	-1.13549	Q9R207	NBN_MOUSE
TurboID																																											1					TurboID	#N/A
																																														Threshold 0.6
																																														1.51572
[truncated: 12 more columns]

## Sheet: Sheet3
				average(log2intensityBiotinEX)-average(log2intensityBiotin)
			Serpina1c	-3.65524
			Serpina1e	-3.10839
			Serpina1c	-2.98337
			Serpina1b	-2.44772
			Mug1	-2.44044
			Hrg	-2.39052
			C8b	-2.38006
			Serpina1a	-2.3648
			C8a	-2.33737
			Serpina3k	-2.33352
			Tf	-2.30186
			Pzp	-2.27791
			Lifr	-2.26606
			C9	-2.2066
			Fga	-2.18403
			Proz	-2.16552
			Serpina3k	-2.1655
			Ces1c	-2.11856
			Serpinf2	-2.11722
			Cpn2	-2.0815
			Ttr	-2.06254
			Plg	-2.04159
			C5	-2.0403
			Alb	-2.0105
			Ahsg	-2.00885
			C6	-2.00831
			Masp2	-1.97961
			Apob	-1.96565
			F13b	-1.86621
			Mbl2	-1.86563
			Apoa1	-1.84892
			Serpinc1	-1.83325
			Mbl1	-1.82179
			Gc	-1.78465
			Klkb1	-1.72764
			Cfb	-1.69546
			Hpx	-1.69364
			Saa4	-1.68788
			Egfr	-1.66705
			Fetub	-1.65172
			Cfi	-1.64222
			Apoh	-1.60961
			Cfh	-1.53614
			Bche	-1.53142
			C3	-1.5253
			Lrg1	-1.50276
			Kng1	-1.49859
			Fn1	-1.49222
			Fgb	-1.48906
			Fgg	-1.39766
			Afm	-1.39138
			Cp	-1.38052
			Apoa2	-1.34634
			Nbn	-1.34527
			Serpina3n	-1.25658
			Clu	-1.24518
			Itih2	-1.23215
			Itih4	-1.22872
			Orm1	-1.15008
			Apoa4	-1.06755
			C1sa	-1.04073
			F2	-1.01864
			Gpc1	-0.996494
			C4b	-0.879506
			Igkc	-0.813928
			Serping1	-0.784988
			Pc	-0.745901
			Itih1	-0.74469
			0	-0.665898
			Lcat	-0.661768
			Cfhr4	-0.615884		Ighm	0.796122
			Srl	-0.443632
			Serpina3m	-0.439786
			Sparcl1	-0.322796
			Kng2	-0.304336
			C7	-0.00514388
			Ighv8-8	0.248963
			Ighg1
			Jchain
			Ighg1
			B2m
			Pon1
			Masp1
			Hp
			F12
			Serpina10
			Ica
			Igkv5-39
			Ighm
			Ighv8-12
			Mgam
			Trdn
			Albfm1
			Ighv6-5
			Mstn
			Man2b1
			Pde8a
			F5
			F10
			Ckm
			Hsp90b1
			C4bpa
			Lpl
			L1cam
			Agt
			F9
			Ctsa
			Ighv3-6
			Vtn
			Apoc1
			Igfbp2
			Serpind1
			Serpinf1
			Rbp4
			Nucb1
			Crisp1
			Serpina6
			Igfn1
			Serpina3g
			Itih3
			Azgp1
			Ceacam14
			Efcab3
			Tmtc3
			Pcyox1
			#N/A
				Threshold 0.6
				1.51572

## Sheet: extended table 1
p-value	-log2FC
0.722711	-0.248963	A0A0A6YXQ0	A0A0A6YXQ0_MOUSE	Ighv8-8	external side of plasma membrane [GO:0009897];immunoglobulin complex, circulating [GO:0042571]
0.403441	-0.796122	P01872	IGHM_MOUSE	Ighm	B cell receptor complex [GO:0019815];cell surface [GO:0009986];cytosol [GO:0005829];external side of plasma membrane [GO:0009897];extracellular space [GO:0005615];immunoglobulin complex, circulating [GO:0042571];integral component of membrane [GO:0016021];membrane [GO:0016020];perinuclear region of cytoplasm [GO:0048471];plasma membrane [GO:0005886]
0.993659	0.00514388	D3YXF5	D3YXF5_MOUSE	C7	extracellular region [GO:0005576];membrane attack complex [GO:0005579]
0.372585	0.304336	Q6S9I0	Q6S9I0_MOUSE	Kng2	collagen-containing extracellular matrix [GO:0062023];extracellular region [GO:0005576];extracellular space [GO:0005615]
0.756245	0.322796	P70663	SPRL1_MOUSE	Sparcl1	extracellular matrix of synaptic cleft [GO:0098965];extracellular space [GO:0005615];glutamatergic synapse [GO:0098978];synapse [GO:0045202]
0.216492	0.439786	Q03734	SPA3M_MOUSE	Serpina3m	extracellular space [GO:0005615]
0.128142	0.443632	Q7TQ48	SRCA_MOUSE	Srl	intracellular membrane-bounded organelle [GO:0043231];sarcoplasmic reticulum lumen [GO:0033018];sarcoplasmic reticulum membrane [GO:0033017]
0.132702	0.615884	E9Q8B5	E9Q8B5_MOUSE	Cfhr4	extracellular space [GO:0005615]
0.451288	0.661768	P16301	LCAT_MOUSE	Lcat	extracellular space [GO:0005615];high-density lipoprotein particle [GO:0034364]
0.464159	0.665898	P01820	HVM44_MOUSE	Hvm44	external side of plasma membrane [GO:0009897];immunoglobulin complex, circulating [GO:0042571]
0.497248	0.74469	Q61702	ITIH1_MOUSE	Itih1	collagen-containing extracellular matrix [GO:0062023];extracellular matrix [GO:0031012];extracellular region [GO:0005576]
0.262985	0.745901	Q05920	PYC_MOUSE	Pc	cytoplasm [GO:0005737];mitochondrial inner membrane [GO:0005743];mitochondrial matrix [GO:0005759];mitochondrion [GO:0005739]
0.0532716	0.784988	P97290	IC1_MOUSE	Serping1	collagen-containing extracellular matrix [GO:0062023];extracellular space [GO:0005615]
0.197658	0.813928	P01837	IGKC_MOUSE	Igkc	external side of plasma membrane [GO:0009897];extracellular region [GO:0005576];immunoglobulin complex, circulating [GO:0042571];plasma membrane [GO:0005886]
0.0132538	0.879506	P01029	CO4B_MOUSE	C4b	axon [GO:0030424];dendrite [GO:0030425];extracellular region [GO:0005576];extracellular space [GO:0005615];neuronal cell body [GO:0043025];other organism cell [GO:0044216];synapse [GO:0045202]
0.0434685	0.996494	Q9QZF2	GPC1_MOUSE	Gpc1	anchored component of plasma membrane [GO:0046658];cell surface [GO:0009986];collagen-containing extracellular matrix [GO:0062023];cytosol [GO:0005829];endosome [GO:0005768];extracellular matrix [GO:0031012];extracellular space [GO:0005615];Golgi lumen [GO:0005796];membrane raft [GO:0045121];neuronal cell body [GO:0043025];nucleoplasm [GO:0005654];plasma membrane [GO:0005886];synapse [GO:0045202]
0.0434768	1.01864	P19221	THRB_MOUSE	F2	collagen-containing extracellular matrix [GO:0062023];external side of plasma membrane [GO:0009897];extracellular space [GO:0005615]
0.184483	1.04073	Q8CG14	CS1A_MOUSE	C1sa	extracellular region [GO:0005576];extracellular space [GO:0005615]
0.22307	1.06755	P06728	APOA4_MOUSE	Apoa4	cell surface [GO:0009986];chylomicron [GO:0042627];cytosol [GO:0005829];extracellular region [GO:0005576];extracellular space [GO:0005615];high-density lipoprotein particle [GO:0034364];synapse [GO:0045202];very-low-density lipoprotein particle [GO:0034361]
0.0717865	1.15008	Q60590	A1AG1_MOUSE	Orm1	extracellular space [GO:0005615]
0.0258242	1.22872	A6X935	ITIH4_MOUSE	Itih4	collagen-containing extracellular matrix [GO:0062023];cytoplasm [GO:0005737];extracellular space [GO:0005615];plasma membrane [GO:0005886]
0.0243438	1.23215	Q61703	ITIH2_MOUSE	Itih2	collagen-containing extracellular matrix [GO:0062023];extracellular region [GO:0005576]
0.0846284	1.24518	Q06890	CLUS_MOUSE	Clu	aggresome [GO:0016235];apical dendrite [GO:0097440];cell periphery [GO:0071944];cell surface [GO:0009986];chromaffin granule [GO:0042583];cytoplasm [GO:0005737];cytoskeleton [GO:0005856];cytosol [GO:0005829];extracellular space [GO:0005615];growth cone [GO:0030426];intracellular membrane-bounded organelle [GO:0043231];mitochondrial inner membrane [GO:0005743];mitochondrion [GO:0005739];neurofibri…
0.0258919	1.25658	Q91WP6	SPA3N_MOUSE	Serpina3n	extracellular region [GO:0005576];extracellular space [GO:0005615]
0.275238	1.34527	Q9R207	NBN_MOUSE	Nbn	chromosome, telomeric region [GO:0000781];Mre11 complex [GO:0030870];nuclear inclusion body [GO:0042405];nucleolus [GO:0005730];nucleus [GO:0005634];PML body [GO:0016605];replication fork [GO:0005657];site of double-strand break [GO:0035861]
0.0018406	1.34634	P09813	APOA2_MOUSE	Apoa2	chylomicron [GO:0042627];cytosol [GO:0005829];extracellular region [GO:0005576];extracellular space [GO:0005615];high-density lipoprotein particle [GO:0034364];spherical high-density lipoprotein particle [GO:0034366];very-low-density lipoprotein particle [GO:0034361]
0.0017164	1.38052	Q61147	CERU_MOUSE	Cp	anchored component of plasma membrane [GO:0046658];extracellular space [GO:0005615];plasma membrane [GO:0005886]
0.0452617	1.39138	O89020	AFAM_MOUSE	Afm	cytoplasm [GO:0005737];extracellular space [GO:0005615]
0.00112414	1.39766	Q8VCM7	FIBG_MOUSE	Fgg	blood microparticle [GO:0072562];cell cortex [GO:0005938];cell surface [GO:0009986];collagen-containing extracellular matrix [GO:0062023];cytoplasm [GO:0005737];external side of plasma membrane [GO:0009897];extracellular space [GO:0005615];fibrinogen complex [GO:0005577];platelet alpha granule [GO:0031091];synapse [GO:0045202]
0.000344274	1.48906	Q8K0E8	FIBB_MOUSE	Fgb	blood microparticle [GO:0072562];cell cortex [GO:0005938];cell surface [GO:0009986];collagen-containing extracellular matrix [GO:0062023];cytoplasm [GO:0005737];endoplasmic reticulum [GO:0005783];external side of plasma membrane [GO:0009897];extracellular space [GO:0005615];fibrinogen complex [GO:0005577];platelet alpha granule [GO:0031091];synapse [GO:0045202]
0.0800751	1.49222	P11276	FINC_MOUSE	Fn1	apical plasma membrane [GO:0016324];basement membrane [GO:0005604];collagen-containing extracellular matrix [GO:0062023];endoplasmic reticulum-Golgi intermediate compartment [GO:0005793];extracellular exosome [GO:0070062];extracellular matrix [GO:0031012];extracellular space [GO:0005615];fibrinogen complex [GO:0005577]
0.192818	1.49859	O08677	KNG1_MOUSE	Kng1	collagen-containing extracellular matrix [GO:0062023];extracellular region [GO:0005576];extracellular space [GO:0005615]
0.223636	1.50276	Q91XL1	Q91XL1_MOUSE	Lrg1	extracellular space [GO:0005615];intracellular membrane-bounded organelle [GO:0043231]
4.87836e-06	1.5253	P01027	CO3_MOUSE	C3	cell surface [GO:0009986];extracellular region [GO:0005576];extracellular space [GO:0005615];protein-containing complex [GO:0032991]
3.97096e-05	1.53142	Q03311	CHLE_MOUSE	Bche	endoplasmic reticulum [GO:0005783];endoplasmic reticulum lumen [GO:0005788];extracellular space [GO:0005615];membrane [GO:0016020];nuclear envelope lumen [GO:0005641]
5.04286e-09	1.53614	P06909	CFAH_MOUSE	Cfh	axon [GO:0030424];cytoplasm [GO:0005737];external side of plasma membrane [GO:0009897];extracellular region [GO:0005576];extracellular space [GO:0005615];mitochondrion [GO:0005739];neuronal cell body [GO:0043025];nucleus [GO:0005634];plasma membrane [GO:0005886]
0.000105909	1.60961	Q01339	APOH_MOUSE	Apoh	cell surface [GO:0009986];chylomicron [GO:0042627];cytoplasm [GO:0005737];extracellular space [GO:0005615];high-density lipoprotein particle [GO:0034364];plasma membrane [GO:0005886];very-low-density lipoprotein particle [GO:0034361]
4.83916e-06	1.64222	Q61129	CFAI_MOUSE	Cfi	extracellular space [GO:0005615];membrane [GO:0016020];nucleus [GO:0005634]
0.00713773	1.65172	Q9QXC1	FETUB_MOUSE	Fetub	extracellular region [GO:0005576];extracellular space [GO:0005615]
3.26859e-06	1.66705	Q01279	EGFR_MOUSE	Egfr	apical plasma membrane [GO:0016324];basal plasma membrane [GO:0009925];basolateral plasma membrane [GO:0016323];cell junction [GO:0030054];cell surface [GO:0009986];cytoplasm [GO:0005737];early endosome membrane [GO:0031901];endocytic vesicle [GO:0030139];endoplasmic reticulum membrane [GO:0005789];endosome [GO:0005768];endosome membrane [GO:0010008];Golgi membrane [GO:0000139];integral component…
0.00107133	1.68788	P31532	SAA4_MOUSE	Saa4	high-density lipoprotein particle [GO:0034364]
9.8519e-07	1.69364	Q91X72	HEMO_MOUSE	Hpx	extracellular space [GO:0005615]
2.61965e-05	1.69546	P04186	CFAB_MOUSE	Cfb	extracellular space [GO:0005615]
4.03007e-05	1.72764	P26262	KLKB1_MOUSE	Klkb1	extracellular space [GO:0005615]
3.64528e-05	1.78465	P21614	VTDB_MOUSE	Gc	axon [GO:0030424];cytoplasm [GO:0005737];cytosol [GO:0005829];extracellular space [GO:0005615];perinuclear region of cytoplasm [GO:0048471]
1.84072e-06	1.82179	P39039	MBL1_MOUSE	Mbl1	collagen trimer [GO:0005581];extracellular space [GO:0005615];multivesicular body [GO:0005771];rough endoplasmic reticulum [GO:0005791]
1.60942e-10	1.83325	P32261	ANT3_MOUSE	Serpinc1	collagen-containing extracellular matrix [GO:0062023];extracellular space [GO:0005615]
1.00969e-05	1.84892	Q00623	APOA1_MOUSE	Apoa1	cell surface [GO:0009986];chylomicron [GO:0042627];cytoplasmic vesicle [GO:0031410];cytosol [GO:0005829];discoidal high-density lipoprotein particle [GO:0034365];endocytic vesicle [GO:0030139];extracellular region [GO:0005576];extracellular space [GO:0005615];high-density lipoprotein particle [GO:0034364];intermediate-density lipoprotein particle [GO:0034363];low-density lipoprotein particle [GO:…
0.00182912	1.86563	P41317	MBL2_MOUSE	Mbl2	collagen-containing extracellular matrix [GO:0062023];collagen trimer [GO:0005581];extracellular space [GO:0005615];protein-containing complex [GO:0032991]
0.0186691	1.86621	Q07968	F13B_MOUSE	F13b	extracellular region [GO:0005576]
0.00289454	1.96565	E9Q414	APOB_MOUSE	Apob	chylomicron [GO:0042627];cytoplasm [GO:0005737];cytosol [GO:0005829];endoplasmic reticulum [GO:0005783];endoplasmic reticulum exit site [GO:0070971];extracellular region [GO:0005576];extracellular space [GO:0005615];high-density lipoprotein particle [GO:0034364];intermediate-density lipoprotein particle [GO:0034363];intracellular membrane-bounded organelle [GO:0043231];lipid droplet [GO:0005811];…
0.00212332	1.97961	Q91WP0	MASP2_MOUSE	Masp2	extracellular space [GO:0005615]
9.87755e-05	2.00831	E9Q6D8	E9Q6D8_MOUSE	C6	extracellular space [GO:0005615];membrane attack complex [GO:0005579]
3.69875e-06	2.00885	P29699	FETUA_MOUSE	Ahsg	collagen-containing extracellular matrix [GO:0062023];extracellular matrix [GO:0031012];extracellular region [GO:0005576];extracellular space [GO:0005615];Golgi apparatus [GO:0005794];protein-containing complex [GO:0032991]
5.43997e-11	2.0105	P07724	ALBU_MOUSE	Alb	basement membrane [GO:0005604];cytoplasm [GO:0005737];endoplasmic reticulum [GO:0005783];extracellular exosome [GO:0070062];extracellular region [GO:0005576];extracellular space [GO:0005615];Golgi apparatus [GO:0005794];myelin sheath [GO:0043209];protein-containing complex [GO:0032991]
5.90531e-06	2.0403	P06684	CO5_MOUSE	C5	extracellular space [GO:0005615];membrane attack complex [GO:0005579]
2.01275e-09	2.04159	P20918	PLMN_MOUSE	Plg	cell surface [GO:0009986];collagen-containing extracellular matrix [GO:0062023];extracellular region [GO:0005576];extracellular space [GO:0005615];extrinsic component of external side of plasma membrane [GO:0031232];extrinsic component of plasma membrane [GO:0019897];glutamatergic synapse [GO:0098978];intracellular membrane-bounded organelle [GO:0043231];plasma membrane [GO:0005886];Schaffer coll…
0.00213939	2.06254	P07309	TTHY_MOUSE	Ttr	extracellular space [GO:0005615];protein-containing complex [GO:0032991]
0.00413433	2.0815	Q9DBB9	CPN2_MOUSE	Cpn2	collagen-containing extracellular matrix [GO:0062023];extracellular matrix [GO:0031012];extracellular space [GO:0005615]
1.00695e-09	2.11722	Q61247	A2AP_MOUSE	Serpinf2	cell surface [GO:0009986];collagen-containing extracellular matrix [GO:0062023];extracellular space [GO:0005615];fibrinogen complex [GO:0005577]
1.02296e-10	2.11856	P23953	EST1C_MOUSE	Ces1c	endoplasmic reticulum lumen [GO:0005788];extracellular space [GO:0005615]
7.04784e-10	2.1655	A0A0R4J0I1	A0A0R4J0I1_MOUSE	Serpina3k	extracellular space [GO:0005615]
0.000223133	2.16552	Q9CQW3	PROZ_MOUSE	Proz	extracellular region [GO:0005576];extracellular space [GO:0005615]
1.27765e-05	2.18403	E9PV24	FIBA_MOUSE	Fga	blood microparticle [GO:0072562];cell cortex [GO:0005938];cell surface [GO:0009986];collagen-containing extracellular matrix [GO:0062023];cytoplasm [GO:0005737];external side of plasma membrane [GO:0009897];extracellular space [GO:0005615];fibrinogen complex [GO:0005577];platelet alpha granule [GO:0031091];rough endoplasmic reticulum [GO:0005791];synapse [GO:0045202]
7.48185e-06	2.2066	P06683	CO9_MOUSE	C9	extracellular space [GO:0005615];membrane attack complex [GO:0005579];other organism cell membrane [GO:0044218];plasma membrane [GO:0005886]
2.76525e-10	2.26606	P42703	LIFR_MOUSE	Lifr	external side of plasma membrane [GO:0009897];extracellular region [GO:0005576];integral component of membrane [GO:0016021];receptor complex [GO:0043235]
1.42906e-09	2.27791	Q61838	PZP_MOUSE	Pzp	collagen-containing extracellular matrix [GO:0062023];extracellular region [GO:0005576];extracellular space [GO:0005615]
2.64783e-11	2.30186	Q921I1	TRFE_MOUSE	Tf	apical plasma membrane [GO:0016324];basal part of cell [GO:0045178];basal plasma membrane [GO:0009925];basement membrane [GO:0005604];cell surface [GO:0009986];cell tip [GO:0051286];clathrin-coated pit [GO:0005905];cytoplasmic vesicle [GO:0031410];dense body [GO:0097433];early endosome [GO:0005769];endocytic vesicle [GO:0030139];endosome [GO:0005768];extracellular region [GO:0005576];extracellula…
1.37041e-05	2.33352	P07759	SPA3K_MOUSE	Serpina3k	collagen-containing extracellular matrix [GO:0062023];extracellular space [GO:0005615]
8.43473e-09	2.33737	Q8K182	CO8A_MOUSE	C8a	extracellular region [GO:0005576];extracellular space [GO:0005615];membrane attack complex [GO:0005579]
4.5062e-08	2.3648	P07758	A1AT1_MOUSE	Serpina1a	collagen-containing extracellular matrix [GO:0062023];endoplasmic reticulum [GO:0005783];extracellular region [GO:0005576];extracellular space [GO:0005615];Golgi apparatus [GO:0005794];intracellular membrane-bounded organelle [GO:0043231]
3.17036e-07	2.38006	Q8BH35	CO8B_MOUSE	C8b	extracellular region [GO:0005576];extracellular space [GO:0005615];membrane attack complex [GO:0005579]
8.50754e-05	2.39052	Q9ESB3	HRG_MOUSE	Hrg	collagen-containing extracellular matrix [GO:0062023];endolysosome [GO:0036019];extracellular region [GO:0005576];phagolysosome membrane [GO:0061474];vesicle [GO:0031982]
2.89509e-09	2.44044	P28665	MUG1_MOUSE	Mug1	extracellular space [GO:0005615]
2.62149e-05	2.44772	P22599	A1AT2_MOUSE	Serpina1b	endoplasmic reticulum [GO:0005783];extracellular region [GO:0005576];extracellular space [GO:0005615];Golgi apparatus [GO:0005794];intracellular membrane-bounded organelle [GO:0043231]
0.000314467	2.98337	A0A0R4J0X5	A0A0R4J0X5_MOUSE	Serpina1c	extracellular space [GO:0005615]
6.89588e-08	3.10839	Q00898	A1AT5_MOUSE	Serpina1e	endoplasmic reticulum [GO:0005783];extracellular space [GO:0005615];Golgi apparatus [GO:0005794];intracellular membrane-bounded organelle [GO:0043231]
5.23237e-08	3.65524	Q00896	A1AT3_MOUSE	Serpina1c	endoplasmic reticulum [GO:0005783];extracellular region [GO:0005576];extracellular space [GO:0005615];Golgi apparatus [GO:0005794];intracellular membrane-bounded organelle [GO:0043231]
	not detected		TurboID
